# Supplementary material
Source: publisher site journal article supplement (https://www.dovepress.com/article/402241)
Supplement: Supplementary file 1 [file get_supplementary_file.php]

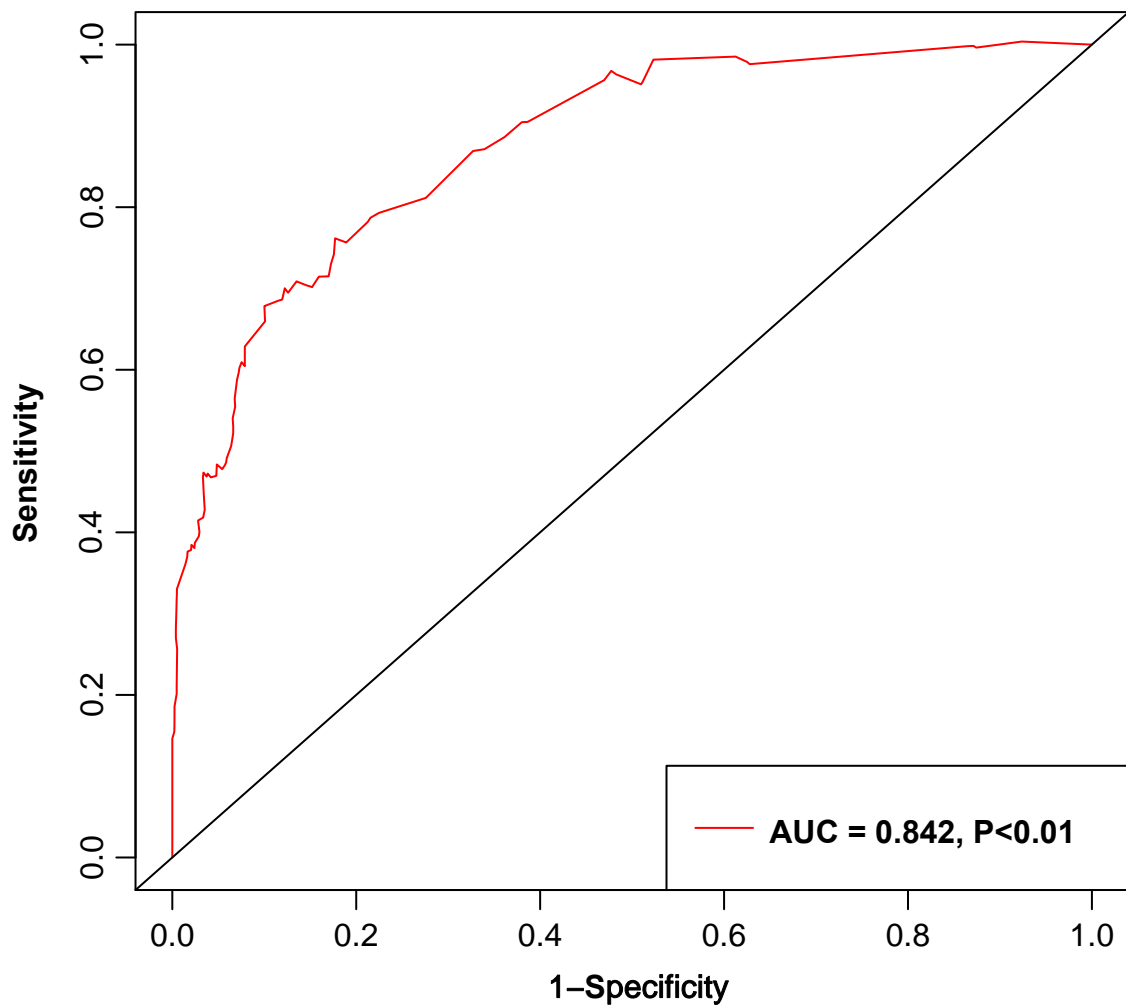

Supplementary Fig1. The ROC curve of 3-year BCR-free survival probability according to the new model's cut-off criteria.
